# Supplementary material
Source: PubMed Central journal article supplement (PMC4018772)
Supplement: jbjs_96_10_832_ds01.pdf [file jbjs_96_10_832_ds01.pdf]

**TABLE E-1 Definitions of Peripheral Neuropathy, Peripheral Artery Disease, and Surgical Site Infection**

|                                                                      | Criteria                                                                                                                                                                                                                                                                                             |
|----------------------------------------------------------------------|------------------------------------------------------------------------------------------------------------------------------------------------------------------------------------------------------------------------------------------------------------------------------------------------------|
| Peripheral neuropathy                                                | MNSI score of $\geq 2.5$ points*                                                                                                                                                                                                                                                                     |
| Semmes-Weinstein monofilament test                                   |                                                                                                                                                                                                                                                                                                      |
| Inability to detect $\geq 2$ plantar sites                           | 1 point                                                                                                                                                                                                                                                                                              |
| Decreased but not completely absent                                  | 1/2 point                                                                                                                                                                                                                                                                                            |
| Intact at all 4 sites                                                | 0 points                                                                                                                                                                                                                                                                                             |
| Vibration testing with 128-Hz tuning fork on dorsal aspect of hallux |                                                                                                                                                                                                                                                                                                      |
| Absent                                                               | 1 point                                                                                                                                                                                                                                                                                              |
| Diminished but not absent                                            | 1/2 point                                                                                                                                                                                                                                                                                            |
| Intact                                                               | 0 points                                                                                                                                                                                                                                                                                             |
| Achilles reflex                                                      |                                                                                                                                                                                                                                                                                                      |
| Absent                                                               | 1 point                                                                                                                                                                                                                                                                                              |
| Present with reinforcement                                           | 1/2 point                                                                                                                                                                                                                                                                                            |
| Normal                                                               | 0 points                                                                                                                                                                                                                                                                                             |
| Deformity (Charcot neuroarthropathy or neurogenic clawtoes)          |                                                                                                                                                                                                                                                                                                      |
| Present                                                              | 1 point                                                                                                                                                                                                                                                                                              |
| Absent                                                               | 0 points                                                                                                                                                                                                                                                                                             |
| Foot ulcer                                                           |                                                                                                                                                                                                                                                                                                      |
| Present                                                              | 1 point                                                                                                                                                                                                                                                                                              |
| Absent                                                               | 0 points                                                                                                                                                                                                                                                                                             |
| Peripheral artery disease                                            | Ankle brachial index $< 0.9$ or monophasic waveforms with ankle brachial index of $> 1.3$ ; any patient who underwent previous revascularization                                                                                                                                                     |
| Surgical site infection                                              | Infection occurring within 30 days postop. at site of incision (pin track infections with use of external fixation not included). Purulent drainage and/or $\geq 2$ signs of wound inflammation (erythema, swelling, warmth, or tenderness) not resolving with elevation of foot and ankle for 5 min |
| Mild                                                                 | Treated with oral antibiotics on outpatient basis                                                                                                                                                                                                                                                    |
| Severe                                                               | Requiring hospital admission or surgical debridement in operating room                                                                                                                                                                                                                               |

\*The maximum score, calculated by summing the subscores (for the Semmes-Weinstein monofilament test and the other four tests listed below it in this table), is 5 points for each limb and 10 points for both limbs.
